# Supplementary material for: Six-coordinate mononuclear dysprosium(iii) single-molecule magnets with the triphenylphosphine oxide ligand
Source: Royal Society of Chemistry journal article supplement (doi:10.1039/d0dt00801j), 2020-01-01
Supplement: d0dt00801j2.pdf [file d0dt00801j2.pdf]

## Six-Coordinate Mononuclear Dysprosium (III) Single-Molecule Magnets with the Triphenylphosphine Oxide Ligand

Kuduva R. Vignesh,<sup>a</sup> Dimitris I. Alexandropoulos,<sup>a</sup> Haomiao Xie,<sup>a</sup> Kim R. Dunbar<sup>a,\*</sup>

### Experimental section

#### General Information

All manipulations were carried out under an inert atmosphere of N<sub>2</sub> using standard Schlenk and glovebox techniques unless otherwise noted. The starting material triphenylphosphine oxide was purchased from Sigma Aldrich, dried under vacuum at 100° C and stored in the glovebox prior to use. Anhydrous DyCl<sub>3</sub>, DyBr<sub>3</sub>, DyI<sub>3</sub> and THF without butylated hydroxytoluene as an inhibitor were purchased from Sigma Aldrich and stored under an inert atmosphere. Diethyl ether was purchased from Sigma Aldrich, dried over molecular sieves, distilled and stored over fresh molecular sieves in an inert atmosphere prior to use.

#### *Synthesis of [Dy<sup>III</sup>Cl<sub>3</sub>(OPPh<sub>3</sub>)<sub>2</sub>(THF)]·THF (1)*

Anhydrous DyCl<sub>3</sub> (0.23 g, 0.2 mmol) was stirred for 20 minutes in THF (10 mL) and triphenylphosphine oxide (0.21 g, 0.1 mmol) was added with stirring for 30 minutes to yield a yellow solution with precipitate. The solution was filtered and evaporated slowly in one case and in another case and diffused with Et<sub>2</sub>O. Crystals of **1** appeared overnight for both methods with an approximate yield of 52% (crystalline product). Anal. Calc. for C<sub>40</sub>H<sub>38</sub>O<sub>3</sub>P<sub>2</sub>Cl<sub>3</sub>Dy (**1**): C, 53.53; H, 4.27 %. Found: C, 53.61; H, 4.18 %. Selected ATR data (Nujol mull, cm<sup>-1</sup>): 1534 (s), 1413 (m), 1354 (m), 1152 (m), 1125 (w), 1084 (m), 1052 (m), 927 (m), 852 (m), 722 (w), 670 (s), 642 (s), 460 (s).

#### *Synthesis of [Dy<sup>III</sup>Br<sub>3</sub>(OPPh<sub>3</sub>)<sub>2</sub>(THF)]·THF (2)*

The synthesis of **1** was followed, but with anhydrous DyBr<sub>3</sub> in place of DyCl<sub>3</sub>. Crystals of **2** appeared after 2-3 days, in approximate yield of 52% (crystalline product). Anal. Calc. for C<sub>40</sub>H<sub>38</sub>O<sub>3</sub>P<sub>2</sub>Br<sub>3</sub>Dy (**2**): C, 46.60; H, 3.72 %. Found: C, 46.51; H, 3.58 %. Selected ATR data (Nujol mull, cm<sup>-1</sup>): 1540 (s), 1418 (m), 1346 (m), 1152 (m), 1090 (m), 1048 (m), 930 (m), 842 (m), 718 (w), 665 (s), 640 (s), 462 (s).

### *Synthesis of [Dy<sup>III</sup>I<sub>2</sub>(OPPh<sub>3</sub>)<sub>4</sub>]I·4THF·0.3H<sub>2</sub>O (3)*

The synthesis of **1** was followed but with anhydrous DyI<sub>3</sub> being used in place of DyCl<sub>3</sub>. Crystals of **3** appeared after 2-3 days in an approximate yield of 50% (crystalline product). Anal. Calc. for C<sub>72</sub>H<sub>60</sub>O<sub>4</sub>P<sub>4</sub>I<sub>3</sub>Dy (**3**): C, 52.21; H, 3.65 %. Found: C, 52.32; H, 3.51 %. Selected ATR data (Nujol mull, cm<sup>-1</sup>): 1540 (s), 1427 (m), 1384 (m), 1120 (m), 1054 (m), 1022 (m), 912 (m), 835 (m), 715 (w), 662 (s), 647 (s), 601, (s), 460 (s).

**Single crystal X-ray crystallography.** Crystals of **1**·THF, **2**·THF and **3**·4THF·0.3H<sub>2</sub>O were placed in @Paratone oil and selected under ambient conditions using a MiTeGen microloop. The crystals were placed in a stream of cold N<sub>2</sub> at 110(1) K on a Bruker D8-VENTURE diffractometer equipped with a I $\mu$ S Cu micro-focus source ( $\lambda = 1.54178$  Å) for **1**·THF and **2**·THF and a Bruker D8-QUEST diffractometer equipped with a I $\mu$ S Mo micro-focus source ( $\lambda = 0.71073$  Å) for **3**·4THF·0.3H<sub>2</sub>O. Initial unit cell were determined using SAINT<sup>1</sup> from a set of 3  $\omega$ -scans consisting of 30 0.5° frames and a sweep width of 15°. From these unit cell, data collection strategies to collect all independent reflections to a resolution of at least 0.82 Å were implemented using APEX3.<sup>1</sup> Full details of the data collections are presented in Table S1.

For each structure, the data were corrected for absorption using SADABS-2014/5.<sup>2</sup> The space group was determined from analysis of the systematic absences and E-statistics using XPREP. The structures were solved using the intrinsic phasing routine in SHELXT.<sup>3</sup> The non-hydrogen atoms were located from the Fourier difference map and refined using a least-squares refinement algorithm in SHELXL-2014<sup>4</sup> within the OLEX<sup>5</sup> program. All non-hydrogen atoms were refined anisotropically. All hydrogen atoms were placed in calculated positions and refined with thermal parameters constrained to their parent atom. Specific details of the structure refinements are presented below. The programs used for molecular graphics were DIAMOND<sup>6</sup> and MERCURY.<sup>7</sup>

**Table S1.** Crystal data and structural refinement parameters for compounds **1** – **3**.

| Complex                                                 | <b>1</b> ·THF                                                                   | <b>2</b> ·THF                                                                   | <b>3</b> ·4THF·0.3H <sub>2</sub> O                                                   |
|---------------------------------------------------------|---------------------------------------------------------------------------------|---------------------------------------------------------------------------------|--------------------------------------------------------------------------------------|
| Empirical formula                                       | C <sub>44</sub> H <sub>46</sub> DyCl <sub>3</sub> P <sub>2</sub> O <sub>4</sub> | C <sub>44</sub> H <sub>46</sub> DyBr <sub>3</sub> P <sub>2</sub> O <sub>4</sub> | C <sub>92</sub> H <sub>100.8</sub> DyI <sub>3</sub> P <sub>4</sub> O <sub>10.3</sub> |
| Formula weight                                          | 969.60                                                                          | 1102.95                                                                         | 2038.4                                                                               |
| Temperature/K                                           | 100 K                                                                           | 100 K                                                                           | 110 K                                                                                |
| Crystal system                                          | Triclinic                                                                       | Triclinic                                                                       | Monoclinic                                                                           |
| Space group                                             | <i>P</i> -1                                                                     | <i>P</i> -1                                                                     | <i>P</i> 21/ <i>c</i>                                                                |
| <i>a</i> /Å                                             | 11.1577(3)                                                                      | 11.3337(3)                                                                      | 18.5253(8)                                                                           |
| <i>b</i> /Å                                             | 13.7559 (4)                                                                     | 14.1733(3)                                                                      | 23.7303(10)                                                                          |
| <i>c</i> /Å                                             | 14.4609(4)                                                                      | 14.5035(4)                                                                      | 20.0073(8)                                                                           |
| $\alpha$ /°                                             | 83.820(1)                                                                       | 82.893(1)                                                                       | 90                                                                                   |
| $\beta$ /°                                              | 73.207(1)                                                                       | 72.502(1)                                                                       | 106.966(10)                                                                          |
| $\gamma$ /°                                             | 86.080(1)                                                                       | 85.981(1)                                                                       | 90                                                                                   |
| Volume/Å <sup>3</sup>                                   | 2110.90(10)                                                                     | 2203.58(10)                                                                     | 8412.6(6)                                                                            |
| <i>Z</i>                                                | 2                                                                               | 2                                                                               | 4                                                                                    |
| $\lambda$ / Å                                           | 1.54178                                                                         | 1.54178                                                                         | 0.71073                                                                              |
| Radiation type                                          | Cu K $\alpha$                                                                   | Cu K $\alpha$                                                                   | Mo K $\alpha$                                                                        |
| $\rho_{\text{calc}}$ / g cm <sup>-3</sup>               | 1.526                                                                           | 1.662                                                                           | 1.609                                                                                |
| $\mu$ / mm <sup>-1</sup>                                | 12.258                                                                          | 13.257                                                                          | 2.125                                                                                |
| Measd / independent (Rint) reflns                       | 39685/7909                                                                      | 35611/8556                                                                      | 134635/15503                                                                         |
| Obsd reflns [ <i>I</i> > 2 $\sigma$ ( <i>I</i> )]       | 7747                                                                            | 8218                                                                            | 14606                                                                                |
| R <sub>1</sub> <sup>a</sup>                             | 0.0232                                                                          | 0.0207                                                                          | 0.0297                                                                               |
| wR <sub>2</sub> <sup>b</sup>                            | 0.0600                                                                          | 0.0487                                                                          | 0.0739                                                                               |
| GOF on <i>F</i> <sup>2</sup>                            | 1.077                                                                           | 1.063                                                                           | 1.183                                                                                |
| ( $\Delta\rho$ ) <sub>max,min</sub> / e Å <sup>-3</sup> | 0.576, -0.979                                                                   | 0.382, -0.689                                                                   | 0.950, -1.120                                                                        |

<sup>a</sup>R<sub>1</sub> =  $\Sigma(|F_o| - |F_c|)/\Sigma|F_o|$ . <sup>b</sup>wR<sub>2</sub> =  $[\Sigma[w(F_o^2 - F_c^2)^2]/\Sigma[w(F_o^2)^2]]^{1/2}$ ,  $w = 1/[\sigma^2(F_o^2) + (ap)^2 + bp]$ , where  $p = [\max(F_o^2, 0) + 2F_c^2]/3$ .

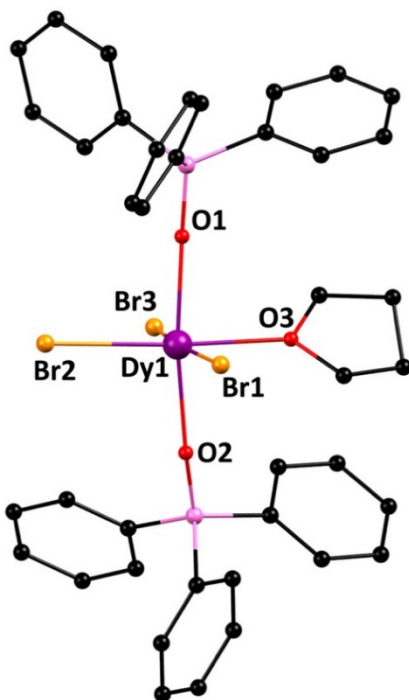

**Figure S1.** Crystal structure of **2**. H atoms were omitted for the sake of clarity. Colour scheme: Dy, purple; O, red; Br, orange; I, dark blue; C, black.

**Table S2.** Shape measures of the 6-coordinate lanthanide coordination polyhedra. The values in boldface indicate the closest polyhedron according to the Continuous Shape Measures.

| Polyhedron <sup>c</sup> | <b>1</b>    | <b>2</b>    | <b>3</b>    |
|-------------------------|-------------|-------------|-------------|
| HP-6                    | 32.92       | 33.13       | 33.92       |
| PPY-6                   | 28.62       | 28.70       | 27.25       |
| OC-6                    | <b>0.85</b> | <b>1.40</b> | <b>2.50</b> |
| TPR-6                   | 16.68       | 16.70       | 15.85       |
| JPPY-6                  | 31.38       | 31.08       | 29.91       |

<sup>c</sup> Abbreviations: HP-6, hexagon; PPY-6, pentagonal pyramid; OC-6, octahedron; TPR-6, trigonal prism; JPPY-6, Johnson pentagonal pyramid J2.

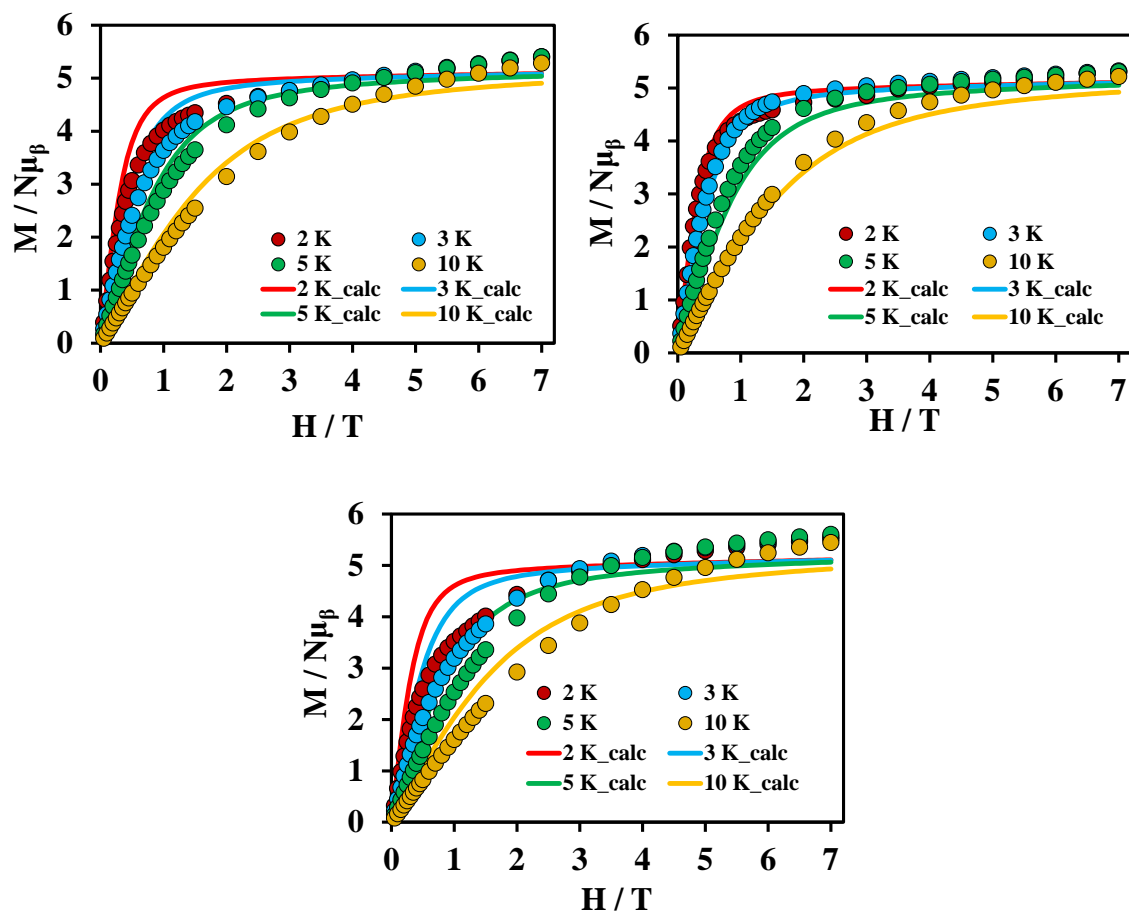

**Figure S2.** Plots of magnetization ( $M$ ) vs field for (top left) **1** (Cl), (top right) **2** (Br) and (bottom) **3** (I) at different temperatures. The solid colour lines are *ab initio* calculated magnetization values.

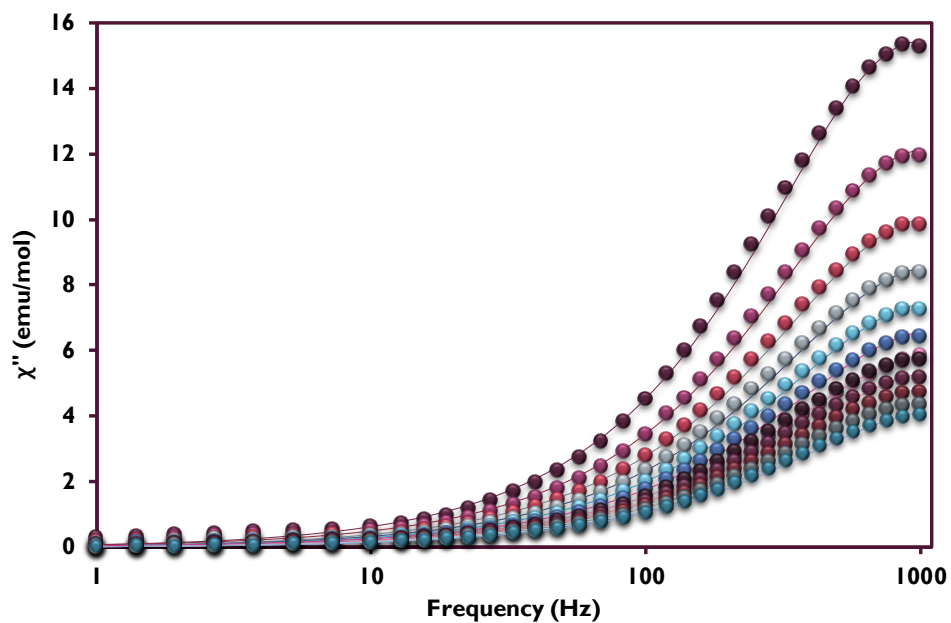

**Figure S3.**  $\chi_M''$  vs frequency for **2** at  $H_{dc} = 0$  Oe.

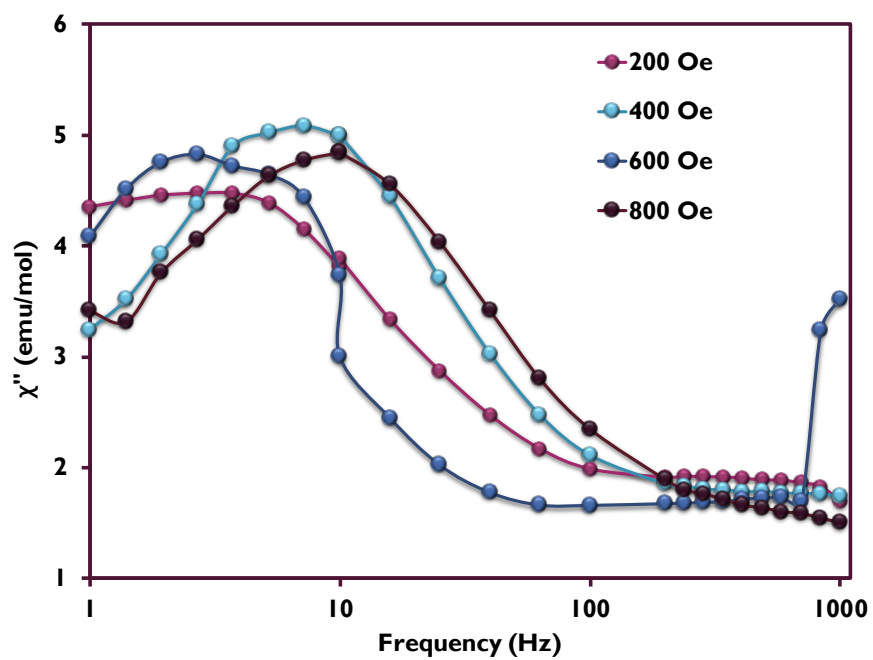

**Figure S4.**  $\chi_M''$  vs frequency plots for **2** at the indicated dc fields with fixed temperature showing the optimal field of 400 Oe.

**Table S3.** Cole-Cole fit values of **1** between 3 – 9 K under a *dc* field of 400 Oe and an *ac* measuring field of 2.0 Oe.

| T / K | $\chi_s / \text{cm}^3 \text{mol}^{-1}$ | $\chi_t / \text{cm}^3 \text{mol}^{-1}$ | $\tau / \text{s}$ | $\alpha$ | Residual |
|-------|----------------------------------------|----------------------------------------|-------------------|----------|----------|
| 3     | 38.12810                               | 63.36470                               | 0.16450           | 0.34536  | 6.02890  |
| 4     | 33.20780                               | 46.32500                               | 0.02300           | 0.13770  | 1.76546  |
| 5     | 28.88600                               | 39.01020                               | 0.00581           | 0.06898  | 1.82667  |
| 6     | 25.49500                               | 33.86340                               | 0.00188           | 0.04934  | 1.37825  |
| 7     | 22.83270                               | 29.96930                               | 0.00074           | 0.04560  | 1.21139  |
| 8     | 20.49450                               | 26.95960                               | 0.00032           | 0.07763  | 0.86000  |
| 9     | 17.16200                               | 24.53340                               | 0.00010           | 0.15754  | 0.69138  |

**Table S4.** Cole-Cole fit values of **2** between 5 – 20 K under a *dc* field of 400 Oe and an *ac* measuring field of 2.0 Oe.

| T / K | $\chi_s / \text{cm}^3 \text{mol}^{-1}$ | $\chi_t / \text{cm}^3 \text{mol}^{-1}$ | $\tau / \text{s}$ | $\alpha$ | Residual |
|-------|----------------------------------------|----------------------------------------|-------------------|----------|----------|
| 5     | 9.857320                               | 27.857000                              | 0.119471          | 0.138583 | 1.436230 |
| 6     | 8.406410                               | 21.657800                              | 0.049762          | 0.060141 | 0.728880 |
| 7     | 7.325590                               | 18.585800                              | 0.018465          | 0.049207 | 0.138288 |
| 8     | 6.510300                               | 16.229100                              | 0.008447          | 0.035752 | 0.109131 |
| 9     | 5.876750                               | 14.423600                              | 0.004450          | 0.022940 | 0.174869 |
| 10    | 5.348400                               | 13.004800                              | 0.002620          | 0.021212 | 0.088406 |
| 11    | 4.941820                               | 11.856400                              | 0.001681          | 0.018763 | 0.063990 |
| 12    | 4.594610                               | 10.883900                              | 0.001140          | 0.015339 | 0.056865 |
| 13    | 4.317420                               | 10.054200                              | 0.000815          | 0.009613 | 0.061781 |
| 14    | 4.087520                               | 9.369620                               | 0.000605          | 0.005153 | 0.053627 |
| 15    | 3.851320                               | 8.745200                               | 0.000459          | 0.006609 | 0.058911 |
| 16    | 3.628380                               | 8.254680                               | 0.000357          | 0.017138 | 0.045087 |
| 17    | 3.462260                               | 7.796970                               | 0.000281          | 0.017418 | 0.053467 |
| 18    | 3.283330                               | 7.375190                               | 0.000225          | 0.018758 | 0.043908 |
| 19    | 3.095950                               | 7.012840                               | 0.000179          | 0.024252 | 0.027232 |
| 20    | 2.985470                               | 6.674650                               | 0.000148          | 0.020934 | 0.032580 |

## Computational Details

Using MOLCAS 8.0,<sup>8</sup> *ab initio* calculations were performed on the Dy(III) ions using their crystal structures. Relativistic effects were taken into account on the basis of the Douglas–Kroll Hamiltonian.<sup>9</sup> The spin-free eigenstates were achieved by the Complete Active Space Self-Consistent Field (CASSCF) method.<sup>10</sup> The basis sets were taken from the ANORCC library for the calculations. We employed the [ANO-RCC... 8s7p5d3f2g1h.] basis set<sup>11</sup> for Dy<sup>III</sup> atoms, the [ANO-RCC...3s2p.] basis set for C atoms, the [ANO-RCC...2s.] basis set for H atoms, the [ANO-RCC...4s3p1d.] basis set for P atoms, the [ANO-RCC...4s3p2d1f.] basis set for O atoms, and the [ANO-RCC...5s4p2d1f.] basis set for the Cl, Br and I atoms. In the first step, we ran a guessorb calculation using the seward module to create the starting guess orbitals. Here, we included nine electrons across seven 4f orbitals of the Dy<sup>III</sup> ion. Then using these guess orbitals, we chose the active space based on the number of active electrons in the number of active orbitals and carried out the SA-CASSCF calculations. Here, the Configuration Interaction (CI) procedure was computed for Dy<sup>III</sup> ion and we considered twenty-one sextet excited states, two hundred and twenty-four quartet excited states and four hundred and eighty doublet excited states in the calculations to compute the anisotropy. All the excited states corresponding to each multiplet of ions were computed in the CASSCF module. After computing these excited states, we mixed all the low-lying excited states (<50,000 cm<sup>-1</sup>) using the RASSI-SO<sup>12</sup> module to calculate the spin-orbit coupled states. Moreover, these computed SO states were considered in the SINGLE\_ANISO<sup>13</sup> program to compute the *g*-tensors. The *g*-tensors for the Kramers doublets of Dy(III) were computed based on the pseudospin *S* = 1/2 formalism.<sup>13</sup> Crystal-field (CF) parameters were extracted using the SINGLE\_ANISO code, as implemented in MOLCAS 8.0. The CF parameters for all three complexes were analysed for deeper insight into the mechanism of magnetic relaxation. The corresponding crystal field Hamiltonian is given in equation:

$$\hat{H}_{CF} = \sum_{k=-q}^q B_k^q \tilde{O}_k^q \dots\dots\dots \text{Eq.1}$$

where  $B_k^q$  is the crystal field parameter, while  $O_k^q$  is the Steven's operator.

We used the Loprop charges to determine the direction of magnetic anisotropy which is a static property that can be computed like a charge, a component of the dipole moment, or an exchange-hole dipole moment,<sup>14</sup> is localized by transforming the property of two centers.<sup>15</sup>



**Table S5.** The  $g$ -tensor for the eight lowest Kramer's doublets in **1** – **4**.

| KDs |       | <b>1</b> | <b>2</b> | <b>3</b> | <b>4</b> |
|-----|-------|----------|----------|----------|----------|
| 1   | $g_x$ | 0.0545   | 0.0062   | 0.2921   | 0.0016   |
|     | $g_y$ | 0.1326   | 0.0111   | 1.0878   | 0.0031   |
|     | $g_z$ | 19.7570  | 19.9166  | 19.0160  | 19.9201  |
| 2   | $g_x$ | 1.7250   | 0.6104   | 0.4212   | 0.2141   |
|     | $g_y$ | 2.7924   | 0.6506   | 0.7321   | 0.2620   |
|     | $g_z$ | 16.9242  | 16.4640  | 18.3411  | 16.7417  |
| 3   | $g_x$ | 2.9973   | 0.5484   | 3.6154   | 2.8995   |
|     | $g_y$ | 6.1035   | 1.8080   | 5.8691   | 3.8349   |
|     | $g_z$ | 10.0641  | 16.7414  | 11.7744  | 14.9433  |
| 4   | $g_x$ | 6.5252   | 3.7515   | 7.9604   | 1.9199   |
|     | $g_y$ | 5.8311   | 6.4397   | 6.0995   | 5.1779   |
|     | $g_z$ | 0.8584   | 10.3210  | 0.0779   | 10.2950  |
| 5   | $g_x$ | 1.1603   | 2.2976   | 2.4533   | 2.6117   |
|     | $g_y$ | 2.1501   | 3.9149   | 3.8144   | 4.3364   |
|     | $g_z$ | 7.9671   | 10.8799  | 10.4990  | 9.8564   |
| 6   | $g_x$ | 10.9430  | 9.0979   | 0.3701   | 9.7931   |
|     | $g_y$ | 7.0435   | 7.1539   | 1.5891   | 5.9341   |
|     | $g_z$ | 1.3336   | 1.5135   | 14.5053  | 0.0972   |
| 7   | $g_x$ | 1.0866   | 1.7423   | 0.1030   | 0.5766   |
|     | $g_y$ | 3.4881   | 5.7748   | 0.2249   | 4.3183   |
|     | $g_z$ | 10.7743  | 10.9951  | 18.0732  | 12.4676  |
| 8   | $g_x$ | 1.4520   | 0.3335   | 0.8733   | 1.4159   |
|     | $g_y$ | 4.1679   | 2.9842   | 1.8175   | 3.4865   |
|     | $g_z$ | 14.5386  | 15.9010  | 16.3762  | 15.4838  |

**Table S6.** RASSI energies of the lowest spin-orbit states ( $\text{cm}^{-1}$ ) of each Dy center in **1** – **4**.

| <b>1</b> | <b>2</b> | <b>3</b> | <b>4</b> |
|----------|----------|----------|----------|
|----------|----------|----------|----------|

|           |           |           |           |
|-----------|-----------|-----------|-----------|
| 0.000     | 0.000     | 0.000     | 0.000     |
| 147.329   | 234.906   | 46.129    | 272.517   |
| 196.254   | 332.299   | 217.089   | 427.299   |
| 225.750   | 358.459   | 312.148   | 475.715   |
| 360.885   | 465.264   | 460.695   | 586.128   |
| 394.610   | 511.852   | 573.250   | 612.742   |
| 435.281   | 551.724   | 591.289   | 665.306   |
| 474.303   | 591.700   | 641.926   | 694.866   |
| 3214.547  | 3110.300  | 3103.525  | 3128.944  |
| 3236.768  | 3289.237  | 3143.900  | 3334.681  |
| 3260.508  | 3351.325  | 3251.771  | 3424.887  |
| 3282.747  | 3382.703  | 3323.951  | 3465.475  |
| 3322.972  | 3405.317  | 3410.108  | 3514.336  |
| 3330.645  | 3451.893  | 3486.435  | 3566.792  |
| 5733.620  | 3459.539  | 3559.136  | 3585.160  |
| 5780.697  | 5775.419  | 5742.834  | 5808.588  |
| 5808.953  | 5870.065  | 5778.545  | 5920.709  |
| 5824.624  | 5895.627  | 5837.304  | 5964.909  |
| 5869.639  | 5935.788  | 5906.179  | 6022.871  |
| 5898.187  | 5997.824  | 5988.644  | 6100.313  |
| 6036.142  | 6047.239  | 6122.648  | 6167.919  |
| 7947.462  | 7992.074  | 7931.637  | 8035.394  |
| 7974.418  | 8035.009  | 7974.895  | 8085.479  |
| 8018.601  | 8065.369  | 8037.929  | 8137.017  |
| 8092.776  | 8141.616  | 8116.790  | 8234.355  |
| 9628.803  | 8231.375  | 8281.807  | 8341.396  |
| 9647.300  | 9717.451  | 9659.154  | 9760.560  |
| 9684.516  | 9740.895  | 9681.174  | 9790.119  |
| 9691.002  | 9755.018  | 9756.407  | 9811.328  |
| 9728.257  | 9811.732  | 9771.468  | 9811.328  |
| 9752.237  | 9827.469  | 9799.972  | 9878.436  |
| 9765.105  | 9841.844  | 9817.966  | 9894.228  |
| 9780.614  | 9874.406  | 9847.228  | 9918.186  |
| 9796.834  | 9896.941  | 9891.421  | 9958.869  |
| 9904.941  | 9912.041  | 9912.858  | 9974.026  |
| 11058.245 | 10027.480 | 10065.218 | 9993.781  |
| 11170.354 | 11112.769 | 11044.455 | 10130.609 |
| 11266.087 | 11315.746 | 11256.821 | 11143.834 |
| 11855.317 | 11378.841 | 11455.121 | 11409.523 |
|           | 11954.916 | 11932.444 |           |

|           |           |           |           |
|-----------|-----------|-----------|-----------|
| 11873.771 | 11981.691 | 11956.741 | 11474.429 |
| 11897.319 | 11993.228 | 11970.310 | 12020.080 |
| 11915.377 | 12019.382 | 12023.489 | 12045.717 |
| 11953.755 | 12063.477 | 12050.638 | 12053.274 |
| 12024.544 | 13692.585 | 13671.511 | 12084.536 |
| 13586.749 | 13785.336 | 13764.552 | 12144.923 |
| 13685.801 | 13803.143 | 13794.577 | 13756.063 |
| 13698.654 | 13834.838 | 13822.000 | 13847.930 |
| 13729.666 | 15107.901 | 15087.784 | 13866.290 |
| 15003.904 | 15182.415 | 15162.850 | 13903.820 |
| 15080.195 | 15192.104 | 15184.156 | 15167.989 |
| 15086.225 | 16150.849 | 16129.248 | 15246.151 |
| 16048.794 | 16160.826 | 16153.061 | 15255.918 |
| 16055.533 | 16747.352 | 16734.434 | 16210.666 |
| 16642.395 | 38949.552 | 38848.386 | 16223.284 |
| 38908.273 | 38989.338 | 38985.922 | 16809.617 |
| 38935.972 | 39071.868 | 39102.031 | 38881.047 |
| 38983.335 | 39242.419 | 39188.946 | 38944.059 |
| 39068.794 | 40328.282 | 40253.086 | 39050.571 |
| 40275.967 | 40510.621 | 40405.980 | 39313.457 |
| 40384.378 | 40615.803 | 40764.745 | 40296.160 |
| 40449.006 | 41450.687 | 41464.604 | 40525.482 |
| 41344.081 | 41513.900 | 41540.734 | 40700.137 |
| 41379.854 |           |           | 41555.094 |

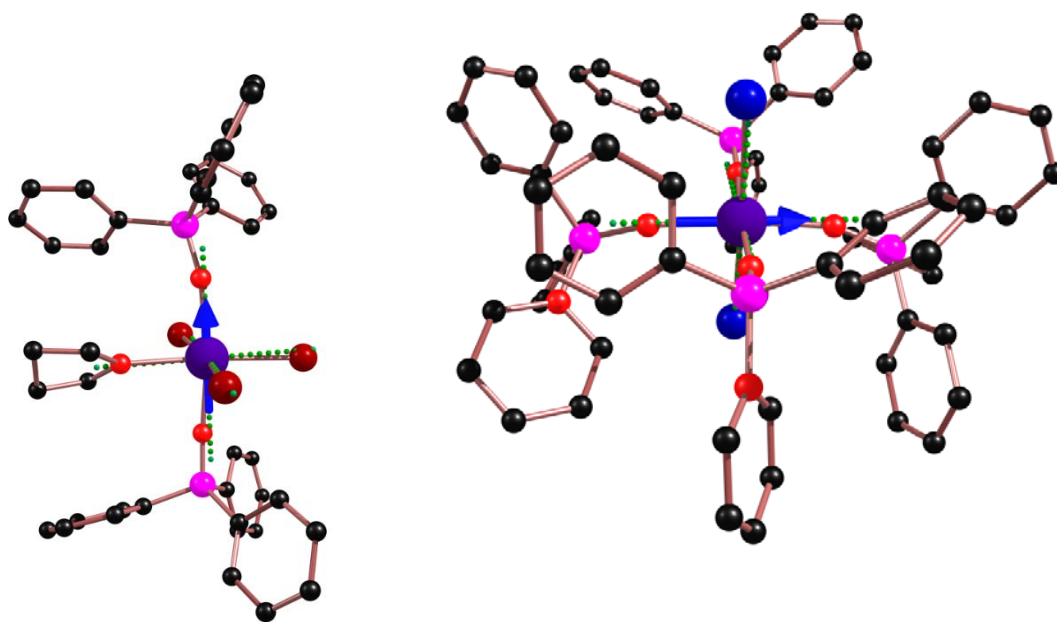

**Figure S5.** The orientation of the principle magnetization  $g_{zz}$ ,  $g_{xx}$ , and  $g_{yy}$  axes (dotted green lines) and the main magnetic anisotropy directions (blue arrows) of the  $\text{Dy}^{\text{III}}$  ions for (left) **2** (the same orientations are applicable to **1**); and (right) **3**. Colour scheme:  $\text{Dy}^{\text{III}}$ , purple; P, pink; Br, dark red; I, navy blue; O, red; N, blue.

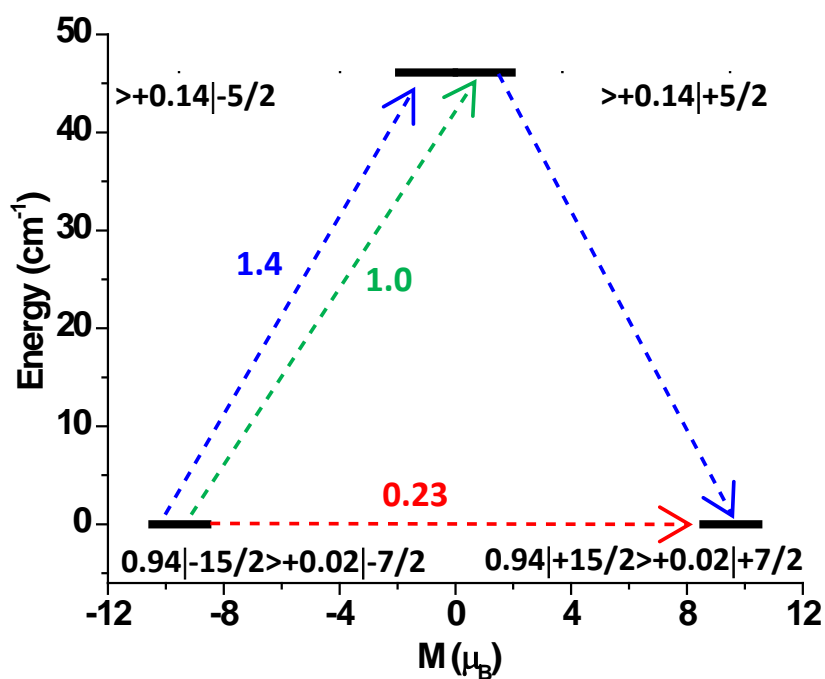

**Figure S6.** Ab initio computed magnetization blocking barrier for **3**.

**Table S7.** SINGLE\_ANISO computed crystal field parameters for **1 – 4**. The major components in the Table are in bold.  $B_k^q$  is the crystal field parameter and  $O_k^q$  is the extended Stevens operator. The quantization axis is chosen to be the main magnetic axis of the ground pseudo-Doublet.

| k | q  | $B_k^q$      | $B_k^q$      | $B_k^q$      | $B_k^q$      |
|---|----|--------------|--------------|--------------|--------------|
|   |    | <b>1</b>     | <b>2</b>     | <b>3</b>     | <b>4</b>     |
| 2 | -2 | 0.08         | -0.03        | 0.08         | 0.14         |
|   | -1 | <b>-1.20</b> | -0.72        | -0.74        | -0.75        |
|   | 0  | <b>-1.20</b> | <b>-2.22</b> | <b>-1.87</b> | <b>-3.04</b> |
|   | 1  | 0.19         | 1.0          | <b>0.12</b>  | <b>0.40</b>  |
|   | 2  | <b>0.47</b>  | <b>-0.33</b> | <b>4.67</b>  | <b>-1.04</b> |
| 4 | -4 | 0.003        | -0.006       | 0.0003       | 0.01         |
|   | -3 | 0.002        | -0.006       | 0.02         | -0.005       |
|   | -2 | 0.0001       | 0.001        | 0.0002       | -0.0003      |
|   | -1 | 0.009        | 0.002        | 0.01         | 0.003        |
|   | 0  | -0.01        | -0.01        | -0.01        | -0.01        |
|   | 1  | -0.0006      | -0.006       | -0.001       | -0.002       |
|   | 2  | 0.0002       | 0.002        | -0.01        | 0.002        |
|   | 3  | 0.002        | 0.01         | 0.002        | 0.008        |
|   | 4  | 0.04         | -0.003       | -0.04        | -0.03        |

**References:**

1. Bruker-AXS, *Journal*, 2015.
2. G. M. Sheldrick, *SADABS*, 1996.
3. G. M. Sheldrick, *Acta Crystallogr. Sect. A, Found. and Adv.*, 2015, **71**, 3-8.
4. G. M. Sheldrick, *Acta crystallogr. Sect. C, Struc. Chem.*, 2015, **C71**, 3-8.
5. O. V. Dolomanov, L. J. Bourhis, R. J. Gildea, J. A. K. Howard and H. Puschmann, *J. Appl. Crystallogr.*, 2009, **42**, 339-341.
6. W. Pennington, *J. Appl. Crystallogr.*, 1999, **32**, 1028-1029.

7. C. F. Macrae, P. R. Edgington, P. McCabe, E. Pidcock, G. P. Shields, R. Taylor, M. Towler and J. van de Streek, *J. Appl. Crystallogr.*, 2006, **39**, 453-457.
8. F. Aquilante, J. Autschbach, R. K. Carlson, L. F. Chibotaru, M. G. Delcey, L. D. Vico, I. F. Galván, N. Ferré, L. M. Frutos, L. Gagliardi, M. Garavelli, A. Giussani, C. E. Hoyer, G. L. Manni, H. Lischka, D. Ma, P. Å. Malmqvist, T. Müller, A. Nenov, M. Olivucci, T. B. Pedersen, D. Peng, F. Plasser, B. Pritchard, M. Reiher, I. Rivalta, I. Schapiro, J. Segarra-Martí, M. Stenrup, D. G. Truhlar, L. Ungur, A. Valentini, S. Vancoillie, V. Veryazov, V. P. Vysotskiy, O. Weingart, F. Zapata and R. Lindh, *J. Comput. Chem.*, 2016, **37**, 506-541.
9. B. A. Hess, C. M. Marian, U. Wahlgren and O. Gropen, *Chem. Phys. Lett.*, 1996, **251**, 365-371.
10. B. O. Roos and P.-A. Malmqvist, *Phys. Chem. Chem. Phys.*, 2004, **6**, 2919-2927.
11. B. O. Roos, R. Lindh, P.-A. Malmqvist, V. Veryazov, P.-O. Widmark and A. C. Borin, *J. Phys. Chem. A*, 2008, **112**, 11431-11435.
12. P. A. Malmqvist, B. O. Roos and B. Schimmelpfennig, *Chem. Phys. Lett.*, 2002, **357**, 230-240.
13. L. F. Chibotaru and L. Ungur, *J. Chem. Phys.*, 2012, **137**, 064112-064122.
14. L. Gagliardi, R. Lindh and G. Karlström, *J. Chem. Phys.*, 2004, **121**, 4494-4500.
15. (a) B. Wang, S. L. Li and D. G. Truhlar, *J. Chem. Theory. Comput.*, 2014, **10**, 5640-5650;  
(b) S. K. Langley, K. R. Vignesh, K. Holton, S. Benjamin, G. B. Hix, W. Phonsri, B. Mobaraki, K. S. Murray and G. Rajaraman, *Inorganics*, 2018, **6**.
